# Supplementary material for: Combining CNNs and Symptom Data for Improved Monkeypox Virus Detection
Source: Preprints.org preprint supplement (doi:10.20944/preprints202410.2588.v1), 2024-10-31
Supplement: Supplementary file 1 [file supplementary]

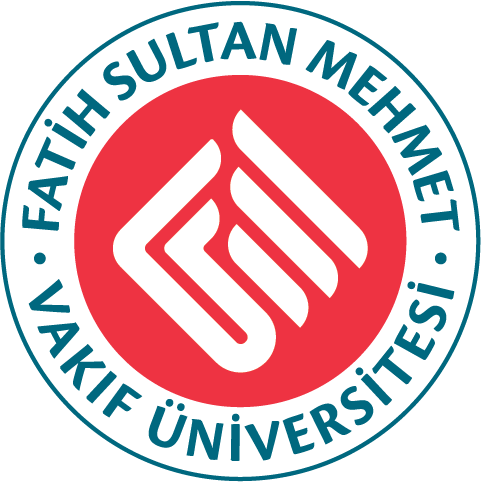


Dear Prof. Dr. Editor,

I am pleased to submit our manuscript titled **"Combining CNNs and Symptom Data for Improved Monkeypox Virus Detection"**. This paper presents a novel method of detecting monkeypox by integrating convolutional neural networks (CNN) with patient symptom data to enhance diagnostic accuracy. Given the global rise of zoonotic diseases and the need for rapid, precise diagnostic tools, this hybrid approach offers significant clinical value in differentiating monkeypox from visually similar diseases, such as smallpox and chickenpox.

In this study, CNN model incorporates skin lesion images alongside nine key symptoms associated with monkeypox. This combined dataset allowed our model to achieve high diagnostic performance, with a balanced accuracy. The results highlight the potential of machine learning in early disease detection, especially in resource-limited settings. Our work demonstrates the applicability of AI in the diagnosis of emerging infectious diseases and proposes a framework that could be adapted to future outbreaks.

I confirm that this manuscript has not been previously published and is not under consideration elsewhere. All authors have approved the manuscript, and there are no conflicts of interest to declare. I look forward to your favourable consideration of our submission and welcome any questions or feedback you may have.

Thank you for your time and consideration.

Sincerely,

Emir Öncü

Department of Biomedical and Computer Engineering

Fatih Sultan Mehmet Vakıf University

Turkey

emir.oncu@stu.fsm.edu.tr
